# Supplementary material
Source: bioRxiv or medRxiv preprint supplement (https://www.biorxiv.org/highwire/filestream/29725/field_highwire_adjunct_files/0/104208-1.pdf)
Supplement: Supplementary file [file 104208-1.pdf]

## **SUPPLEMENTAL TABLES**

**Supplemental Table 1. Constructs and primers used in this study.**

| <b>AP2IX-4<sup>HA</sup></b> |               |                  |                                                     |                                                                                            |
|-----------------------------|---------------|------------------|-----------------------------------------------------|--------------------------------------------------------------------------------------------|
| <b>Amplicon</b>             | <b>Primer</b> | <b>Direction</b> | <b>Sequence</b>                                     | <b>Cloning Notes</b>                                                                       |
| AP2IX-4 (CDS)               | Ap2ix4Ha3-F   | FWD              | <u>TACTTCCAATCCAATTTAATGC</u> AGCAGCATCCAACCTCGCCCT | Insertion into pLIC-3xHA via PacI linearization; underlined portion contains PacI homology |
| AP2IX-4 (CDS)               | Ap2ix4Ha3-R   | REV              | <u>TCCTCCACTTCCAATTTTAGC</u> TGCGAGGACGGGGACGCTG    | Insertion into pLIC-3xHA via PacI linearization; underlined portion contains PacI homology |

| <b>Δap2IX-4</b>                |               |                  |                                                                     |                                                                                                                                                             |
|--------------------------------|---------------|------------------|---------------------------------------------------------------------|-------------------------------------------------------------------------------------------------------------------------------------------------------------|
| <b>Amplicon</b>                | <b>Primer</b> | <b>Direction</b> | <b>Sequence</b>                                                     | <b>Cloning Notes</b>                                                                                                                                        |
| AP2IX-4 upstream genomic       | Ap2ix4B4-F    | FWD              | <u>GGGGACAACCTTTGTATAGAAAAGTTG</u> CTCGCAACAGCCACTCCCCG             | underlined portion contains attB4 for integration into pDONR P4-P1R                                                                                         |
| AP2IX-4 upstream genomic       | Ap2ixB1r-R    | REV              | <u>GGGGACTGCTTTTTTGTACAAACTTG</u> CCAACAACGCAAGCAGCCCC              | underlined portion contains attB1r for integration into pDONR P4-P1R                                                                                        |
| AP2IX-4 downstream genomic     | Ap2ix4B2r-F   | FWD              | <u>GGGGACAGCTTTCTTGTACAAAGTGG</u> TCAACACGGCGTCCAGCGTC              | underlined portion contains attB2r for integration into pDONR P2R-P3                                                                                        |
| AP2IX-4 downstream genomic     | Ap2ix4B3-R    | REV              | <u>GGGGACAACCTTTGTATAATAAAGTTG</u> GCCGATCAGCCACTCCCTG              | underlined portion contains attB3 for integration into pDONR P2R-P3                                                                                         |
| DHFR <sup>+</sup> -TS minigene | DHFR1st-F     | FWD              | <u>GGGGACAGCTTTCTTGTACAAAGTGGCT</u> CAGGAAAGACAGGCTCCGGA            | amplicon spans promoter and coding sequence; underlined portion contains attB1 for integration into pDONR221                                                |
| DHFR <sup>+</sup> -TS minigene | DHFR1st-R     | REV              | GGGGACAACCTTTGTATAATAAAGTTGCTGACCGCTGATACATGATGCA                   | amplicon spans promoter and coding sequence                                                                                                                 |
| DHFR <sup>+</sup> -TS minigene | DHFR2nd-F     | FWD              | TATCTAGAGACCCCAAGAGGGGCATC                                          | amplicon is coding sequence with overlapping homology to DHFR1st-F and DHFR-1st R amplicon                                                                  |
| DHFR <sup>+</sup> -TS minigene | DHFR2nd-R     | REV              | <u>TAGCGGCCGCGGGGACCACCTTTGTACAAGAAAGCTGGGT</u> AGGATCGATCCCCCGTTTG | amplicon is coding sequence with overlapping homology to DHFR1st-F and DHFR-1st R amplicon; underlined portion contains attB2 for integration into pDONR221 |

| <b>Δap2IX-4::AP2IX-4<sup>HA</sup></b> |               |                  |                                                |                                                                                            |
|---------------------------------------|---------------|------------------|------------------------------------------------|--------------------------------------------------------------------------------------------|
| <b>Amplicon</b>                       | <b>Primer</b> | <b>Direction</b> | <b>Sequence</b>                                | <b>Cloning Notes</b>                                                                       |
| AP2IX-4 upstream genomic              | IX-4p-F       | FWD              | <u>TTCCAATCCAATTTAGC</u> CACCGCTACCATGACTGGGGA | Insertion into pLIC-3xHA via PacI linearization; underlined portion contains PacI homology |
| AP2IX-4 upstream genomic              | IX-4p-R       | REV              | CCCCCGTGTCTACCGACAT                            | Insertion into pLIC-3xHA                                                                   |
| AP2IX-4 (CDS)                         | IX-4cDNA-F1   | RWD              | ATGTCGGTAGACACGGGGGG                           | Insertion into pLIC-3xHA                                                                   |
| AP2IX-4 (CDS)                         | IX-4cDNA-R1   | REV              | TGCAGATACTTGGGGACGCA                           | Insertion into pLIC-3xHA                                                                   |
| AP2IX-4 (CDS)                         | IX-4cDNA-F2   | FWD              | TGCGTCCCCAAGTATCTCGCA                          | Insertion into pLIC-3xHA                                                                   |
| AP2IX-4 (CDS)                         | IX-4cDNA-R2   | REV              | <u>CCACTTCCAATTTTAGC</u> TGCGAGGACGGGGACGCT    | Insertion into pLIC-3xHA via PacI linearization; underlined portion contains PacI homology |

**Confirmation of gene deletion and correct construct integration in  $\Delta ap2IX-4$  and in  $\Delta ap2IX-4::AP2IX-4^{HA}$** 

| Primer | Direction | Sequence               |
|--------|-----------|------------------------|
| A      | FWD       | TCCCTGTGCCACGCCGAAAT   |
| B      | FWD       | TCAGCACGCAAACCACCGCA   |
| C      | FWD       | TAGGGACAGTCTCCGCTCCCA  |
| D      | REV       | AGGACACACCACTGTCACCCC  |
| E      | REV       | TAGCTGATGCAAGCGCCCGA   |
| F      | FWD       | TCTGCCCACGACAGCAGACA   |
| G      | REV       | GCCATTGCGGTGTCGTGGAT   |
| H      | FWD       | CTGCGGCTGTTGATTCTCC    |
| I      | FWD       | CCTAGGTACCCGTACGACGT   |
| J      | REV       | TACCGGCACCACTTCTCGTACT |

**RT-PCR confirmation of gene deletion; GAPDH control**

| Primer        | Direction | Sequence             |
|---------------|-----------|----------------------|
| B             | FWD       | TCAGCACGCAAACCACCGCA |
| E             | REV       | TAGCTGATGCAAGCGCCCGA |
| qPCR_GAPDH_Fw | FWD       | GGTGTTCCTGCTGCGAT    |
| qPCR_GAPDH_Rv | REV       | GCCTTTCCGCCGACAAT    |

**Supplemental Table 2. Differentially expressed genes (FC $\geq$ 2) under tachyzoite conditions in PruQ $\Delta$ *ap2IX-4* compared to parental PruQ parasites.**

| Probe Set ID      | Gene          | Annotation                                                         | FC of PruQ $\Delta$ ap2IX-4 vs. PruQ Parental |
|-------------------|---------------|--------------------------------------------------------------------|-----------------------------------------------|
| 80.m02181_at      | TGME49_288950 | AP2IX-4                                                            | -32.9                                         |
| 611.m00052_at     | TGME49_317705 | enoyl-CoA hydratase/isomerase family protein                       | -5.7                                          |
| 55.m00162_at      | TGME49_261650 | hypothetical protein                                               | -4.7                                          |
| 83.m01216_at      | TGME49_293480 | MoeA N-terminal region (domain I and II) domain-containing protein | -4.3                                          |
| 25.m01822_at      | TGME49_208730 | microneme protein, putative; MCP4                                  | -3.9                                          |
| 551.m00220_at     | TGME49_307760 | tubulin-tyrosine ligase family protein                             | -3.3                                          |
| 31.m00936_at      | TGME49_212940 | hypothetical protein                                               | -3.2                                          |
| 20.m00337_at      | TGME49_203720 | vitamin K epoxide reductase complex subunit 1                      | -3.2                                          |
| 37.m00739_at      | TGME49_217400 | hypothetical protein                                               | -3.2                                          |
| 641.m00181_at     | TGME49_320740 | hypothetical protein                                               | -3.0                                          |
| 23.m00155_at      | TGME49_207210 | hypothetical protein                                               | -3.0                                          |
| 72.m00004_at      | TGME49_280570 | SRS35A bradyzoite surface antigen (SAG4.2, p18)                    | -2.8                                          |
| 541.m02517_at     | TGME49_304930 | hypothetical protein                                               | -2.7                                          |
| 25.m00212_at      | TGME49_208740 | microneme protein, putative                                        | -2.5                                          |
| 50.m03090_at      | TGME49_245770 | hypothetical protein                                               | -2.5                                          |
| 80.m02369_s_at    | TGME49_292375 | KRUF family protein                                                | -2.4                                          |
| 94.m00031_s_at    | TGME49_296340 | hypothetical protein                                               | -2.2                                          |
| 76.m01568_s_at    | TGME49_284420 | hypothetical protein                                               | -2.2                                          |
| 41.m01360_at      | TGME49_222370 | SAG-related sequence SRS13                                         | -2.2                                          |
| 55.m04865_at      | TGME49_260190 | microneme protein MIC13                                            | -2.2                                          |
| 49.m03275_at      | TGME49_242110 | Rhoptry kinase family protein ROP38                                | -2.2                                          |
| 55.m00276_at      | TGME49_255210 | ATPase, AAA family protein                                         | -2.1                                          |
| 52.m00020_at      | TGME49_253710 | hypothetical protein                                               | -2.1                                          |
| 49.m03157_at      | TGME49_239580 | hypothetical protein                                               | 4.6                                           |
| 583.m00678_at; 5f | TGME49_312905 | hypothetical protein                                               | 3.75; 2.3                                     |

**Supplemental Table 3. Differentially expressed genes (FC $\geq$ 2) under bradyzoite conditions in PruQ $\Delta$ *ap2IX-4* compared to parental PruQ and  $\Delta$ *ap2IX-4::AP2IX-4*<sup>HA</sup> parasites.**

| Probe Set ID    | Gene          | Annotation                                                         | FC of PruQ $\Delta$ ap2IX-4<br>vs. PruQ Parental | FC of $\Delta$ ap2IX-4::AP2IX-4 <sup>HA</sup><br>vs PruQ $\Delta$ ap2IX-4 |
|-----------------|---------------|--------------------------------------------------------------------|--------------------------------------------------|---------------------------------------------------------------------------|
| 80.m02181_at    | TGME49_288950 | AP2IX-4                                                            | -38.1                                            | 22.0                                                                      |
| 74.m00761_at    | TGME49_281590 | hypothetical protein                                               | -9.8                                             | ND                                                                        |
| 641.m01540_at   | TGME49_319890 | hypothetical protein                                               | -7.6                                             | 1.8                                                                       |
|                 |               | MoeA N-terminal region (domain I and II)                           |                                                  |                                                                           |
| 83.m01216_at    | TGME49_293480 | domain-containing protein                                          | -7.4                                             | 3.4                                                                       |
| 49.m03376_at    | TGME49_243940 | hypothetical protein                                               | -7.0                                             | 1.8                                                                       |
| 42.m05851_at    | TGME49_224760 | SAG-related sequence SRS40E (SRS4)                                 | -6.5                                             | ND                                                                        |
| 20.m00387_at    | TGME49_204050 | subtilisin SUB1 (SUB1)                                             | -4.9                                             | 1.7                                                                       |
| 641.m01563_at   | TGME49_320200 | SAG-related sequence SRS16A (SRS16A)                               | -3.9                                             | 1.0                                                                       |
| 611.m00052_at   | TGME49_317705 | enoyl coA hydratase/isomerase                                      | -3.8                                             | 2.2                                                                       |
| 80.m05017_at    | TGME49_288685 | Fe-S protein assembly co-chaperone HscB prote                      | -3.7                                             | ND                                                                        |
| 113.m01573_at   | TGME49_297910 | hypothetical protein                                               | -3.7                                             | 2.1                                                                       |
| 55.m04651_at    | TGME49_256792 | hypothetical protein                                               | -3.6                                             | 2.1                                                                       |
| 65.m01112_at    | TGME49_277490 | hypothetical protein                                               | -3.6                                             | ND                                                                        |
| 52.m01621_at    | TGME49_253930 | GCC2 and GCC3 domain-containing protein                            | -3.6                                             | 1.3                                                                       |
| 37.m00739_at    | TGME49_217400 | hypothetical protein                                               | -3.5                                             | 3.2                                                                       |
| 33.m01360_at    | TGME49_215360 | hypothetical protein                                               | -3.3                                             | ND                                                                        |
| 1.m00014_at     | TGME49_200010 | hypothetical protein                                               | -3.3                                             | 1.2                                                                       |
| 55.m04769_at    | TGME49_258550 | SAG-related sequence SRS28 (SRS28)                                 | -3.3                                             | ND                                                                        |
| 65.m01169_at    | TGME49_278390 | Toxoplasma gondii family A protein                                 | -3.2                                             | ND                                                                        |
| 20.m00368_at    | TGME49_005680 | hypothetical protein                                               | -3.2                                             | 1.7                                                                       |
| 76.m01687_at    | TGME49_287040 | hypothetical protein                                               | -3.1                                             | 1.8                                                                       |
| 541.m02054_at   | TGME49_306270 | hypothetical protein                                               | -3.0                                             | 1.7                                                                       |
| 83.m00011_at    | TGME49_294980 | hypothetical protein                                               | -3.0                                             | 1.1                                                                       |
| 49.m03110_s_at  | TGME49_038630 | SAG-related sequence protein SRS22I                                | -2.9                                             | ND                                                                        |
| 65.m01167_at    | TGME49_278370 | Toxoplasma gondii family A protein<br>inorganic anion transporter, | -2.7                                             | 1.2                                                                       |
|                 |               | sulfate permease (SulP) family protein                             | -2.6                                             | 2.2                                                                       |
| 72.m00387_at    | TGME49_280500 | hypothetical protein                                               | -2.6                                             | 1.1                                                                       |
| 59.m03715_at    | TGME49_273980 | hypothetical protein                                               | -2.6                                             | 1.1                                                                       |
| 55.m04926_at    | TGME49_261250 | histone H2A1                                                       | -2.6                                             | 1.7                                                                       |
| 83.m01260_at    | TGME49_294330 | EGF-like domain-containing protein                                 | -2.6                                             | ND                                                                        |
| 644.m00075_at   | TGME49_321170 | Toxoplasma gondii family C protein                                 | -2.5                                             | 1.1                                                                       |
| 49.m05665_at    | TGME49_240090 | rhoptyr kinase family protein ROP34, putative                      | -2.5                                             | 1.6                                                                       |
| 55.m04942_at    | TGME49_261580 | histone H2AX                                                       | -2.5                                             | -1.0                                                                      |
| 107.m00007_s_at | TGME49_207010 | SAG-related sequence SRS48K (SRS48K)                               | -2.5                                             | ND                                                                        |
| 145.m00602_at   | TGME49_300220 | hypothetical protein                                               | -2.5                                             | ND                                                                        |
| 49.m03102_at    | TGME49_238440 | SAG-related sequence SRS22A (SRS22A)                               | -2.5                                             | -1.2                                                                      |
| 46.m02899_at    | TGME49_235500 | hypothetical protein                                               | -2.4                                             | 1.4                                                                       |
| 55.m00103_at    | TGME49_258870 | hypothetical protein                                               | -2.4                                             | -1.0                                                                      |
| 57.m01872_s_at  | TGME49_267680 | microneme protein MIC12                                            | -2.3                                             | 1.1                                                                       |
| 72.m00383_at    | TGME49_280460 | AP2 domain transcription factor AP2VIIa-2 (AP2)                    | -2.3                                             | 1.3                                                                       |
| 25.m01903_s_at  | TGME49_209985 | cAMP-dependent protein kinase                                      | -2.3                                             | 1.4                                                                       |
| 33.m01267_at    | TGME49_214190 | SRS46                                                              | -2.3                                             | 1.6                                                                       |
| 145.m00583_at   | TGME49_299780 | hypothetical protein                                               | -2.3                                             | 1.4                                                                       |
| 37.m00779_at    | TGME49_217860 | hypothetical protein                                               | -2.2                                             | -1.1                                                                      |
| 49.m03134_at    | TGME49_239260 | histone H4                                                         | -2.2                                             | 1.7                                                                       |
| 59.m03529_at    | TGME49_270700 | hypothetical protein                                               | -2.2                                             | 1.3                                                                       |
| 25.m00004_at    | TGME49_208850 | SAG-related sequence SRS11 (SAG2B)                                 | -2.2                                             | 1.0                                                                       |
| 65.m01111_s_at  | TGME49_277270 | NTPase II                                                          | -2.2                                             | -1.1                                                                      |
| 35.m00905_at    | TGME49_216720 | hypothetical protein                                               | -2.2                                             | -1.1                                                                      |
| 63.m00155_at    | TGME49_275460 | hypothetical protein                                               | -2.1                                             | 1.4                                                                       |
| 65.m02534_at    | TGME49_278460 | hypothetical protein                                               | -2.1                                             | 1.1                                                                       |
| 59.m06125_at    | TGME49_268980 | hypothetical protein                                               | -2.1                                             | -1.2                                                                      |
| 55.m00013_at    | TGME49_261240 | histone H3                                                         | -2.1                                             | 2.4                                                                       |
|                 |               | ICE family protease (caspase)                                      |                                                  |                                                                           |
| 65.m02538_at    | TGME49_278975 | p20 domain-containing protein                                      | -2.1                                             | 1.0                                                                       |
| 55.m08192_at    | Not annotated | N/A                                                                | -2.1                                             | ND                                                                        |
| 44.m00027_at    | TGME49_230180 | hypothetical protein (GRA24 )                                      | -2.1                                             | -1.0                                                                      |
| 551.m00227_at   | TGME49_307830 | hypothetical protein                                               | -2.1                                             | 1.0                                                                       |
| 59.m06089_at    | TGME49_273650 | hypothetical protein                                               | -2.1                                             | 1.3                                                                       |
| 65.m01152_at    | TGME49_278130 | hypothetical protein                                               | -2.1                                             | -1.2                                                                      |
| 44.m02688_at    | TGME49_231960 | omega secalin, putative                                            | -2.0                                             | 1.3                                                                       |
| 541.m02039_at   | TGME49_305160 | histone H2Ba                                                       | -2.0                                             | 2.9                                                                       |
| 37.m00011_at    | TGME49_217610 | hypothetical protein                                               | -2.0                                             | 1.4                                                                       |
| 583.m05572_at   | TGME49_313680 | hypothetical protein                                               | -2.0                                             | -1.0                                                                      |

|                |               |                                                                                              |      |     |
|----------------|---------------|----------------------------------------------------------------------------------------------|------|-----|
| 79.m00015_at   | TGME49_245432 | hypothetical protein                                                                         | -2.0 | 1.1 |
| 57.m01786_s_at | TGME49_266340 | Toxoplasma gondii family A protein<br>cytochrome b(N-terminal)/b6/<br>petB subfamily protein | -2.0 | 1.0 |
| 54.m00004_x_at | TGME49_255060 |                                                                                              | -2.0 | 3.9 |

ND = Not detected



| Probe Set ID        | Gene          | Annotation                                                 | FC of PruQ $\Delta$ ap2IX-4 vs. PruQ Parental | FC of $\Delta$ ap2IX-4::AP2IX-4 <sup>HA</sup> vs PruQ $\Delta$ ap2IX-4 |
|---------------------|---------------|------------------------------------------------------------|-----------------------------------------------|------------------------------------------------------------------------|
| 59.m03411_at        | TGME49_268860 | ENO1                                                       | 10.2                                          | -2.3                                                                   |
| 100665_at; 583.m006 | TGME49_312905 | hypothetical protein                                       | 9.7; 2.4                                      | -7.3                                                                   |
| 25.m01888_at        | TGME49_209755 | hypothetical protein                                       | 7.0                                           | -2.5                                                                   |
| 55.m00009_at        | TGME49_259020 | bradyzoite antigen BAG1 (BAG1)                             | 5.7                                           | -1.6                                                                   |
| 20.m03909_at        | TGME49_205430 | isovaleryl-CoA dehydrogenase                               | 5.4                                           | -1.4                                                                   |
| 83.m01239_at        | TGME49_293790 | hypothetical protein                                       | 4.9                                           | -2.1                                                                   |
| 65.m01148_at        | TGME49_278080 | Toxoplasma gondii family A protein                         | 4.9                                           | -1.7                                                                   |
| 80.m03985_at        | TGME49_288630 | nucleosome assembly protein (NAP), putative                | 4.5                                           | ND                                                                     |
| 35.m00032_at        | TGME49_216140 | tetratricopeptide repeat-containing protein                | 4.4                                           | -1.8                                                                   |
| 52.m01553_at        | TGME49_252640 | P-type ATPase PMA1                                         | 4.4                                           | -1.7                                                                   |
| 57.m00029_at        | TGME49_266860 | BTB/POZ domain-containing protein                          | 4.3                                           | -1.2                                                                   |
|                     |               | GDA1/CD39 (nucleoside phosphatase)                         |                                               |                                                                        |
| 42.m03416_at        | TGME49_225290 | family protein (B-NTPase)                                  | 4.1                                           | -2.1                                                                   |
|                     |               | ATP-binding cassette G family transporter                  |                                               |                                                                        |
| 583.m05692_at       | TGME49_315560 | ABCG77 (ABCG77)                                            | 4.0                                           | -1.5                                                                   |
| 80.m00010_at        | TGME49_291040 | LDH2                                                       | 4.0                                           | -1.6                                                                   |
| 20.m00351_at        | TGME49_202020 | DnAK-TPR                                                   | 3.9                                           | -1.8                                                                   |
| 59.m06103_at        | TGME49_271320 | hypothetical protein                                       | 3.9                                           | -1.4                                                                   |
| 41.m01304_at        | TGME49_221550 | se, MAPK family, MEK kinase-related (incomplete cat        | 3.7                                           | 1.9                                                                    |
| 80.m02361_at        | TGME49_292260 | SAG-related sequence SRS36B (SAG5D )                       | 3.6                                           | -1.9                                                                   |
| 57.m01804_at        | TGME49_266700 | hypothetical protein                                       | 3.5                                           | -1.9                                                                   |
| 25.m01805_at        | TGME49_208370 | myosin heavy chain, putative                               | 3.3                                           | -1.2                                                                   |
| 49.m03214_at        | TGME49_240470 | hypothetical protein                                       | 3.2                                           | -1.7                                                                   |
| 23.m00152_at        | TGME49_207160 | SAG-related sequence SRS49D (SAG2C)                        | 3.1                                           | -2.2                                                                   |
|                     |               | cold-shock DNA-binding                                     |                                               |                                                                        |
| 57.m01861_at        | TGME49_267470 | domain-containing protein                                  | 3.1                                           | -1.7                                                                   |
| 52.m02726_at        | TGME49_253680 | hypothetical protein                                       | 3.0                                           | -1.5                                                                   |
| 25.m01822_at        | TGME49_208730 | MCP4                                                       | 3.0                                           | -1.6                                                                   |
| 641.m01512_at       | TGME49_319340 | hypothetical protein                                       | 2.9                                           | -1.3                                                                   |
| 23.m00015_s_at      | TGME49_207150 | SAG-related sequence SRS49C (SAG2D)                        | 2.9                                           | -1.9                                                                   |
| 49.m07181_at        | TGME49_244335 | hypothetical protein                                       | 2.9                                           | -1.3                                                                   |
| 80.m02121_at        | TGME49_287960 | hypothetical protein                                       | 2.7                                           | -1.6                                                                   |
| 52.m01629_at        | TGME49_254020 | dynein intermediate chain, putative                        | 2.7                                           | -1.3                                                                   |
| 38.m02376_at        | TGME49_218470 | protein disulfide-isomerase                                | 2.6                                           | -1.9                                                                   |
| 52.m00020_at        | TGME49_253710 | hypothetical protein                                       | 2.6                                           | -1.7                                                                   |
| 80.m05025_at        | TGME49_288475 | hypothetical protein                                       | 2.6                                           | -1.2                                                                   |
| 49.m07182_at        | TGME49_244335 | hypothetical protein                                       | 2.6                                           | -1.3                                                                   |
| 38.m01099_at        | TGME49_218930 | BTB/POZ domain-containing protein                          | 2.6                                           | -1.2                                                                   |
| 23.m00155_at        | TGME49_207210 | hypothetical protein                                       | 2.5                                           | -1.3                                                                   |
|                     |               | dynein gamma chain,                                        |                                               |                                                                        |
| 541.m01230_at       | TGME49_306338 | flagellar outer arm, putative                              | 2.5                                           | -1.9                                                                   |
|                     |               | peroxisomal biogenesis factor                              |                                               |                                                                        |
| 49.m05712_at        | TGME49_243720 | PEX11 (PEX11)                                              | 2.5                                           | -1.9                                                                   |
| 583.m05655_at       | TGME49_315100 | hypothetical protein                                       | 2.5                                           | -1.3                                                                   |
| 55.m04853_at        | TGME49_259960 | Nucleoside-diphosphatase                                   | 2.4                                           | -1.5                                                                   |
| 583.m00678_at       | TGME49_312905 | hypothetical protein                                       | 2.4                                           | -2.0                                                                   |
| 583.m09133_at       | TGME49_314250 | bradyzoite rhopty protein BRP1 (BRP1)                      | 2.4                                           | -1.8                                                                   |
| 52.m01578_at        | TGME49_253330 | kinase family protein, truncated (incomplete catalytic tri | 2.3                                           | -1.5                                                                   |
| 46.m01670_at        | TGME49_235860 | subtilisin SUB11 (SUB11)                                   | 2.2                                           | -1.0                                                                   |
|                     |               | NAD(P) transhydrogenase                                    |                                               |                                                                        |
| 162.m00002_at       | TGME49_301210 | subunit beta, putative                                     | 2.2                                           | -1.4                                                                   |
| 83.m02719_at        | TGME49_295015 | patched family protein                                     | 2.2                                           | 1.0                                                                    |
| 42.m03382_at        | TGME49_224830 | hypothetical protein                                       | 2.2                                           | 1.5                                                                    |
| 41.m01322_at        | TGME49_221840 | hypothetical protein                                       | 2.2                                           | -1.5                                                                   |
| 588.m00009_at       | TGME49_220720 | hypothetical protein                                       | 2.2                                           | -1.4                                                                   |
| 541.m00143_at       | TGME49_305460 | methionine aminopeptidase 2, putative                      | 2.1                                           | -1.3                                                                   |
| 57.m01692_at        | TGME49_264650 | phosphoacetylglucosamine mutase                            | 2.1                                           | -1.4                                                                   |
|                     |               | methylmalonate-semialdehyde                                |                                               |                                                                        |
| 583.m05427_at       | TGME49_311370 | dehydrogenase [acylating], putative                        | 2.1                                           | -2.0                                                                   |
| 44.m00019_at        | TGME49_230130 | hypothetical protein                                       | 2.0                                           | -1.4                                                                   |
| 31.m01831_at        | TGME49_213460 | hypothetical protein                                       | 2.0                                           | -1.7                                                                   |
| 57.m01820_at        | TGME49_266900 | cyclin, N-terminal domain-containing protein               | 2.0                                           | -1.6                                                                   |
